# COGNITIVE ENDOPHENOTYPES OF MODERN AND EXTINCT HOMININS ASSOCIATED WITH *NTNG* GENE PARALOGS

Pavel Prosselkov<sup>1,2\*</sup>, Ryota Hashimoto<sup>3,4</sup>, Denis Polygalov<sup>5</sup>, Kazutaka Ohi<sup>3,4</sup>, Qi Zhang<sup>1</sup>,  
Thomas J. McHugh<sup>5</sup>, Masatoshi Takeda<sup>3,4</sup> and Shigeyoshi Itohara<sup>1\*</sup>

<sup>1</sup>Laboratory of Behavioral Genetics, RIKEN Brain Science Institute, Wakoshi, 351-0198  
Saitama, Japan

<sup>2</sup>Graduate School, Department of Veterinary Medicine, Faculty of Agriculture, Tokyo  
University, 113-8657 Tokyo, Japan

<sup>3</sup>Department of Psychiatry, Osaka University Graduate School of Medicine, Osaka, Japan

<sup>4</sup>Molecular Research Center for Children's Mental Development, United Graduate School of  
Child Development, Osaka University, Kanazawa University and Hamamatsu University  
School of Medicine, Osaka, Japan

<sup>5</sup>Laboratory of Circuit and Behavior Physiology, RIKEN Brain Science Institute, 351-0198  
Saitama, Japan

\*corresponding authors:

prosselkov@brain.riken.jp

sitohara@brain.riken.jp

Keywords: evolution, gene duplication, psychogenetics, cognitive endophenotype,  
paleogenetics

## 26 ABSTRACT

27 A pair of vertebrate-specific and brain-expressed pre-synaptic genes, *NTNG1* and *NTNG2*,  
 28 contributes to the Intellectual Quotient (IQ) test scores in a complementary manner. Single  
 29 nucleotide polymorphisms (SNPs) of *NTNG1* are associated with attenuated verbal  
 30 comprehension (VC) or processing speed (PS) while *NTNG2* SNPs affect working memory  
 31 (WM) and perceptual organization (PO), forming cognitive endophenotypes in healthy and  
 32 schizophrenia (SCZ)-affected human subjects. Regions of interest (ROIs), defined as 21  
 33 nucleotide (nu) long *NTNG* gene loci symmetrically embedding the IQ-affecting mutation  
 34 alleles (VC/PS and WM/PO), underwent dramatic evolutionary changes from mice through  
 35 primates to hominins, at the accelerated rates. Mutation alleles associated with the higher VC  
 36 and WM IQ scores are found in the genomes of extinct hominins of Neolithic times, however,  
 37 lower WM scores associated allele is also detectable in Mesolithic hunters genomes. Protein  
 38 sequence of *NTNG1* is 100% conserved among the primates, archaic and modern extinct  
 39 hominins while *NTNG2* underwent a recent selection sweep encoding a primate-specific  
 40 S371A/V (~50,000 yrs BC), and a modern human (5,300 yrs BC) T346A substitutions. We  
 41 show that a 500 mln yrs old genomic duplication of a synapse primordial gene provided a  
 42 substrate for further synapse elaborations and its ultimate capacitive expansion of what  
 43 evolved into a vertebrate cognitive superior complexity – intelligence.

44

## INTRODUCTION

S. Ohno ingeniously proposed that new gene function can result from a gene duplication and following it gene paralogs SF (1). Two gene paralogs, *NTNG1* and *NTNG2*, expressed predominantly in the brain (2), and encoding Netrin-G1 and Netrin-G2 proteins, respectively, are expressed pre-synaptically and segregate in a non-overlapping manner into distinct neuronal circuits (3, 4). They are related to the netrin family of axonal guidance cues (5) but differ in that they attach to the axonal membrane via a glycosylphosphatidylinositol (GPI) link (6, 7), a known lipid raft-associated membrane signaling cascade organiser (6, 8). The first evolutionary precursor of *NTNG* as a single gene copy can be located in the genome of a primitive vertebrate tunicate/urochordate *Ciona intestinalis* (sea squirt, ENSCING00000024925), reported to be the first organism with the neural crest primordials (9), multipotent brain progenitor cells (10), and neurogenic placodes, facilitating the transition from pelagic invertebrate life style to a predatory vertebrate (11). The dramatic expansion of human cerebral cortex over the course of evolution (12-15) had provided new niches for accommodating either *de novo* or advancing pre-existed cognitive features and culminating in the positively selected human cognitive functions (16).

IQ tests are a surrogate measure of general human cognitive ability characterising intelligence. They are often administered as WAIS-III/IV (17) and represent a cumulative score of 4 cognitive indices: VC, WM, PO and PS frequently referred as “cognitive domains” (18). IQ has been validated by factor analyses (19), and a common factor (correlate) influencing each of them frequently referred as *g*, or “general intelligence”, proposed by Spearman (20), but recently challenged as the only existing correlate (21). IQ is affected by several mental disorders including schizophrenia (SCZ) characterised by severe cognitive deficits in WM (22), behavioral flexibility and resulting in low performance in cognitive tests (23-25). Since both *NTNG* paralogs have been reportedly associated with SCZ (26-34) we

69 investigated whether these gene paralogs contribute to human intelligence by assessing the  
70 IQ of human carriers for the *NTNG1* and *NTNG2* SNP alleles against non-carriers with and  
71 without SCZ.

72

## RESULTS

Several *NTNG1* and *NTNG2* SNPs have been previously reported to be associated with SCZ (27, 30). We have found that out of 11 SNPs tested, five affect the IQ scores and composite domains in human subjects (Figure 1, Supplementary Table 1 (ST1)). SCZ patients carrying rs2218404 T allele (Figure 1A-1) of *NTNG1* (T/G and T/T genotypes, N = 25 patients) compared with G/G genotype (N = 36 patients) demonstrated attenuated full-scale IQ (FIQ, ANCOVA  $p = 0.0057$  ( $F = 7.80$ )), and VIQ ( $p = 0.0033$  ( $F = 8.87$ )). VC domain score was the main contributor to the VIQ decline ( $p = 0.0050$  ( $F = 8.08$ ), Figure 1B-1), with low scores across all parameters except comprehension (CH): vocabulary (Vc,  $p = 0.020$  ( $F = 5.49$ )), similarities (SiM,  $p = 0.041$  ( $F = 4.23$ )), and information (IF,  $p = 0.0067$  ( $F = 7.50$ ), Figure 1B-1 lower panel). Thus, a mutation allele of *NTNG1*, rs2218404, is associated with low VC and affects the VIQ via the attenuated Vc, SiM and IF subscores. The next *NTNG1* SNP found to affect IQ was rs96501, with attenuated PS in healthy human subjects C allele carriers (N = 45) vs T/T genotypes (N = 98,  $p = 0.028$  ( $F = 4.89$ ), Figure 1B-1) with no effect on SCZ patients. The contributing affecting score was symbol search (SS,  $p = 0.053$  ( $F = 3.79$ ), Figure 1B-1, lower panel) with digit symbol coding (DSC) being also attenuated but non-significantly ( $p = 0.12$  ( $F = 2.40$ )). Three other SNPs mapped to *NTNG2* (Figure 1A-2) have been also shown to affect IQ. Healthy carriers of the *NTNG2* SNP rs1105684 A allele (N = 49) showed a lower FIQ ( $p = 0.018$  ( $F = 5.70$ )), VIQ ( $p = 0.029$  ( $F = 4.90$ )), and PIQ ( $p = 0.048$  ( $F = 3.99$ )) when compared with the T/T genotypes (N = 96, Figure 1B-2). To check for a potential dosage-dependent effect of a mutation allele on IQ score, *NTNG2* SNP rs2149171 SCZ and healthy human subject cohorts were each split on 3 genotypes, respectively: C/C (N = 14 and 39), C/T (N = 29 and 73), and T/T (N = 15 and 30). The presence of the C allele as a single copy (C/T genotype) was strongly associated with a prominent attenuation in the IQ scores of SCZ patients and was essentially identical to that

97 produced by the C/C genotype when both are compared to the T allele carriers (FIQ:  $p =$   
98 0.014 ( $F = 4.35$ ); VIQ:  $p = 0.029$  ( $F = 3.60$ ); PIQ:  $p = 0.035$  ( $F = 3.42$ ), Figure 1B-2). If in  
99 the case of *NTNG1* located SNP rs2218404 the lower VIQ score was contributed mainly by  
100 the decreased VC domain scores for Vc, SiM, and IF (Figure 1B-1), in the case of *NTNG2*  
101 located rs2149171 the CH and WM domain scores were responsible for the VIQ decline in C  
102 allele carriers ( $p = 0.012$  ( $F = 4.54$ ) for CH and  $p = 0.040$  ( $F = 3.27$ ) for WM ( $N = 12$  (C/C);  
103  $N = 25$  (C/T) and  $N = 14$  (T/T)). Similarly to VIQ, where CH of rs2149171 complements the  
104 cognitive endophenotype produced by the T-allele of rs2218404, the PIQ attenuated score in  
105 the case of rs2149171 was due to lower PO score ( $p = 0.050$  ( $F = 3.04$ ), Figure 1B-2) in the C  
106 allele carriers. The third *NTNG2* located SNP found to affect the human IQ was rs2274855  
107 (Figure 1A-2) with a cognitive endophenotype associated with the A-allele presence in SCZ  
108 patients ( $N = 33$ ) vs G/G genotypes ( $N = 26$ ) and resembling that of the described above C-  
109 allele of rs2149171. Accordingly, the attenuated scores were: FIQ ( $p = 0.012$  ( $F = 6.44$ )),  
110 VIQ ( $p = 0.018$  ( $F = 5.70$ )), and PIQ ( $p = 0.036$  ( $F = 4.46$ ), Figure 1B-2). Similarly to  
111 rs2149171 the lower VIQ score was due to declined CH ( $p = 0.035$  ( $F = 4.49$ )) but unaffected  
112 VC that is contrary (complementary) to the rs2218404 endophenotype (Figure 1B-1). WM  
113 was robustly affected by the A-allele presence ( $N = 29$ ;  $p = 0.023$  ( $F = 5.28$ )) contributed by  
114 the low DS score ( $p = 0.026$  ( $F = 5.04$ )) with LNS and AM being unaffected (Figure 1B-2,  
115 lower panel). The observed PO score was comprised by the declined matrix reasoning (MR,  $p$   
116  $= 0.038$  ( $F = 4.34$ )), block design (BD,  $p = 0.041$  ( $F = 4.23$ )) with picture completion being  
117 unchanged (Figure 1B-2, lower panel). Thus, all three aforementioned *NTNG2* SNPs affect  
118 the VIQ and PIQ in human subjects with the first one contributed by the CH subscore and  
119 WM and the latter by the PO score (Figure 1C). Contrary to this, the *NTNG1* located SNP  
120 (rs2218404) affects the VIQ through the lower Vc, SiM and IF scores and affecting the VC  
121 domain scores. Another SNP, rs96501, affects PS domain, although in healthy subjects only.

It can be concluded that both genes (as paralogs) contribute to the cognitive scoring produced upon the implemented IQ testing but in a cognitive domain-complementary manner. *NTNG1* contributes to the VC and PS while *NTNG2* for the WM and PO domain scores (Figure 1C).

The robust link observed between a single SNP and affected cognitive domain IQ score (Figure 1) can be explained by some global dramatic perturbations caused by the presence of a mutated allele and/or a functional importance of its context-dependent positioning on the gene (Figure 2A and 3A). To determine a potential significance of the SNP alleles' epistatic environment we compared the nucleotide (nu) sequence within the immediate vicinity of a SNP allele positioning (50 nu upstream and downstream) in mice, primates and modern human. We compared all 11 SNPs used for the IQ screening and plotted the identity percent as a function of distance from the mutated allele position (Figure 2B and 3B, see Supplementary Materials = SM). We found that the identity percent distribution over the analysed areas of  $\pm 50$  nu is not uniform and displays a SNP allele position-centred dramatic evolutionary changes pointing towards a potential functional significance of the immediate vicinity of a SNP as short as  $\pm 10$  nu and not further, referred from here and beyond as a Region Of Interest (ROI) for each specific SNP allele. We calculated the rates of evolutionary changes for each ROI as a percent identity change over the lapsed mln yrs of evolution (Figure 2C and 3C). Among the 6 *NTNG1*-located SNP ROIs three of them display accelerated rates of evolution from marmoset to chimpanzee (rs2218404, rs628117, rs96501) when compared to the mouse-marmoset rates, and rs2218404 (affecting VC in human subjects) additionally demonstrates an accelerated rate of evolution on the chimpanzee to human path (Figure 2C). As for the *NTNG2* located ROIs (Figure 3-B), rs1105684 is remarkably consistent at displaying high evolutionary rates around 0.8 and, together with rs2274855, both have identical rates at the mouse-marmoset and chimpanzee-human paths, but differ dramatically at the marmoset-chimpanzee point (0.8 vs 0, respectively). rs2274855

147 is the only *NTNG2*-nested SNP ROI that underwent an AE from chimpanzee to human. Next  
148 we compared the DNA sequences of all 11 ROIs across mice, primates and extinct hominins  
149 *NTNG* gene paralogs (see ST2 for the datasets sources used for the genes reconstruction). T-  
150 allele of rs2218404 is detectable in marmoset and its position in mouse corresponds to  
151 adenosine (Figure 2D). G-allele (associated with a higher VC score comparing to the human  
152 T-allele carriers) is found in Mesolithic hunter Loschbour (8,000 BC) but not in another  
153 ancient hunter Motala12 and is also present in other two hominins belonging to the Neolithic  
154 period, Iceman and Eskimos (5,300 and 4,000 yrs BC, respectively). rs628117 is the only  
155 *NTNG1*-related mutation near vicinity of which ( $\pm 50$  nu) is located an intra-hominins (Es, Ice,  
156 Lo) mutation (Figure 2B, low left). The next, PS-affecting, ROI of rs96501 displays an  
157 intricate path of T-allele evolution (associated with a higher PS score) being anciently  
158 conserved from mice to primates but later substituted on the less efficient (in terms of the  
159 generated IQ scores) C allele in Neanderthals, later again replaced by the T allele in  
160 Mesolithic hunters and coming back during the Neolithic times (Figure 2D). The first *NTNG2*  
161 SNP rs1105684 is located at the beginning of the gene and affects WM in healthy human  
162 subjects (Figure 3A). The origin of the T-allele is evolutionary bound to marmoset since its  
163 position in mice is occupied by another pyrimidine base C (Figure 3D). Next on the gene are  
164 two SNP alleles for rs7851893 and rs3824574 which do not affect IQ and similarly to  
165 rs1105684 are surrounded by highly conserved ROIs not only in hominins and chimpanzee  
166 (100% identity) but also in marmoset (except 1 mutation for rs7851893). rs2149171 ROI  
167 (affecting the WM and PO scores) similarly to rs3824574 is 100% conserved across the all  
168 species (including the mouse) except the allele itself. The attenuating IQ C-allele position is  
169 occupied in mice genome by T but present in Iceman and Eskimos genes. A distinct  
170 evolutionary path is taken by another cognitive endophenotype-associated and affecting WM  
171 and PO scores A-allele of rs2274855 and its ROI (Figure 3D). Its position in mice is likely to

be occupied by the C pyrimidine base (the software places a blank instead of it) which is gradually substituted on purine G in chimpanzee and misplaced by the lower IQ score-associated A-allele in Mesolithic hominins. And 20 nu downstream of the centre of ROI is located a modern human-specific point mutation translated into the T346A protein substitution (as described below).

The distinct picture of evolutionary changes among the *NTNG1* and *NTNG2* nested SNPs has prompted us to compare evolutionary rates for the full-length proteins encoded by these gene paralogs, Netrin-G1 and Netrin-G2, respectively (2, 35). Netrin-G1 undergoes only few changes in its amino acid composition with the maximum calculated rate of evolution reaching 0.05 when mice and marmoset proteins are compared, 0.01 among the primates, and 0.03 between chimpanzee and human due to a single point mutation A81S (Figure 2E and SM: Netrin-G1), absent in other primates. Netrin-G2 evolves 2.8 times faster between mouse and marmoset than its paralog, Netrin-G1, and continues evolving with a steady rate of 0.05 from primates to human (Figure 3E and SM: Netrin-G2). We have also reconstructed both proteins from ancient (Neanderthals, Paleolithic time) and extinct hominins (Mesolithic and Neolithic times) and compared them with primates' and mice' Netrin-G orthologs (Figure 2F and 3F). Netrin-G1 is a highly conserved protein among the primates and hominins (Figure 3F). As for Netrin-G2, a mutation shared among the Neanderthals' and Mesolithic genomes, primates and mice (T346A) is absent in the Neolithic Iceman and modern human (the signal for Motala3, Motala1 and MezmayaskayaNea is not clear due to low sequence coverage). Primates (marmoset and chimpanzee) share another mutation (S371A/V) preserved in mouse and absent in hominins (further details can be found in the SM: Results).

## DISCUSSION

*NTNG* paralog SNPs and associated cognitive endophenotypes of human subjects. Shortcomings of cognitive and information processing are key features of SCZ diagnosis (36). They are frequently manifested as impairments in PO, WM, VC and PS (see (37) for references) and reported as attenuated scores upon IQ tests implementation. SCZ patients carrying a mutation allele for one of *NTNG* gene paralog SNPs form cognitive endophenotypes affecting the IQ scores (Figure 1C). The term “endophenotype” was originally coined by (38) and later advanced through the field of psychiatry by Gottesman and Shields (reviewed in (39)) as a biomarker associated with a specific phenotypic trait (40). The formed SCZ endophenotypic groups comprise from subjects with either affected VIQ (via attenuated VC by *NTNG1* rs2218404 or WM by *NTNG2* rs2149171 and rs2274855) or affected PIQ (via attenuated PO by *NTNG2* rs2149171 and rs2274855). In two extra cases PS is affected by rs96501 of *NTNG1* and WM by rs1105684 of *NTNG2* (Figure 1B-1 and B-2, respectively) but in healthy human subjects. Such intriguing non-overlapping effect on the IQ domains prompts us to conclude that *NTNG* paralogs complement each other function and represent an example of how a synapse-expressed genes affect the human cognitive abilities, perhaps through the precision of neuronal connectivity perturbations and concomitant miswirings. The observed phenomena of the affected WM is the most striking due to its multifaceted constructive nature (41) underlying many, if not all, cognitive tasks such as comprehension, reasoning and learning (42) and historically introduced by Baddeley as the reading span test (43). Lack of the localization effect of *NTNG2* SNP mutation alleles, all three are located in different parts of the gene (Figure 1A-2) but associated with identical endophenotype (Figure 1B-2), points to a uniform nature of the *NTNG2* function distribution over the entire gene. An obviously non-coding nature of all five IQ-affecting alleles (rs2149171 despite being exon 4-located encodes a silent F246F mutation) corroborates an

idea that anthropoid trait-associated loci lie outside coding protein areas (44, 45). This hints towards a potential of these alleles to perturb genes regulatory functions, e.g. mRNA splicing, affecting downstream located pivotally functional *NTNG* elements such as Ukd-domain encoding exons 6 and 7 or a unique Netrin-Gs trait – GPI-link. Alternatively, or simultaneously, the *NTNG* SNP alleles may be embedded into an epistatic network of other genes influencing human cognitive traits (46). However since it is usual for a SNP effect to be estimated using an additive model (assuming either independent and cumulative single contribution) to the mean of a trait with the small effect size the power to detect the epistatic environment drastically declines. Contrary to the genetic associations with gene expression having large effect sizes (46), cognitive trait-associated effect sizes are reportedly small (47), e.g. the largest effect sizes of the variance of intelligence scores accounted for only 0.2% (48), 0.5% on GWA studies of 1,583 adolescence (49) or was predicted to be ~1% on 3,511 adults (50). Another GWAS of educational attainment (sharing a moderate correlate with intelligence), which included 126,559 individuals, reports on just 1% of the variance but only 0.02% in a replication sample (51). Our data support the preexisted conclusion that human cognitive traits modalities are not described by statistically large effect sizes.

Evolutionary elaborations of the embedding IQ-affecting mutations loci. Eleven previously published SCZ-associated SNPs were tested for their effect on IQ performance of human subjects and 5 of them were found to be associated with attenuated IQ cognitive endophenotypes (Figure 1B-1 and B-2). ROIs of 3 of them (rs2218404, rs1373336 and rs2274855) underwent an AE from chimpanzee to human when compared to New World monkeys to apes (marmoset-chimpanzee) path (Figure 2C and 3C). Two of them affect IQ in humans (rs2218404 – VC and rs2274855 – WM, Figure 1B-1 and B-2) while being located within the vicinity of exon 5 (2,275 nu downstream and 15 nu upstream, respectively) – a part of the lowest percent identity coding DNA among the *NTNG* gene paralogs (52).

245 Presence of the evolutionary accelerated regions within the *NTNG* genes non-coding areas  
 246 underscores them as contributors to the human-specific traits along with other genes (53).  
 247 However, not only ROIs of the IQ-affecting alleles but the alleles themselves demonstrate  
 248 several unique evolutionary features (see SM: Discussion). To understand evolutionary forces  
 249 driving the emergence of cognitive endophenotype-associated alleles we have deduced a set  
 250 of rules outlined as follows. 1. An alternative (mutated) allele evolutionary appearance  
 251 coincides with the lack of any other mutations within ROI (a conserved island rule); 2.  
 252 positioning of the future mutation often represents a turning point of dramatic changes of an  
 253 allele ROI (e.g. as seen in marmoset: rs2218404 (50-90%), rs628117 (30-80%), rs96501  
 254 (100-40%)); 3. an AE of ROI often precedes the emergence of a mutation allele (e.g.  
 255 rs2218404: chimpanzee to human ( $k = 1.59$ ), appearance of “G” in Loschbour; rs628117:  
 256 marmoset to chimpanzee ( $k = 1.10$ ), appearance of “T” in AltaiNea; rs96501: marmoset to  
 257 chimpanzee ( $k = 0.83$ ), appearance of “C” in AltaiNea; rs2274855: chimpanzee to human ( $k$   
 258  $= 0.79$ ), appearance of “A” in Motala12; 4. low identity percent (equivalent to subsequent  
 259 substantial evolutionary changes) among the evolutionary species within the allele  
 260 surrounding proximity of as long as  $\pm 50$  nu is not sufficient for the future mutated allele  
 261 significance as a cognitive endophenotype determinant (as deduced by the IQ score) as seen  
 262 for the rs1373336, rs1444042, rs4915045 and rs7851893 (none of them are IQ-affecting,  
 263 though associated with SCZ, despite showing (very) low identity in mice). Rather some  
 264 dramatic changes within the allele’s immediate proximity of  $\pm 10$  nu (defined as a ROI)  
 265 preceded or followed by more stringently conserved DNA are necessary (the conserved  
 266 island perturbation rule). Currently we are unable to state that the IQ-associated alleles ROIs  
 267 represent regulatory loci and an important source of evolutionary innovation (54) but they  
 268 may be the smallest functional blocks of a strong positive selection that exerts its action upon,  
 269 similarly to the 20–30 nu clusters of strongly conserved non-coding elements (CNEs),

transcription factor binding sites (TFBS), RNA splicing and editing motifs (55).

Extinct hominins and IQ-associated mutation alleles. Availability of archaic genomes allows excavation for the advantageous alleles that modern humans acquired from archaic extinct hominins such as Neandertals and Denisovans who used to live 230,000-30,000 years ago (Middle/Upper Paleolithic, Old Stone Age) defined by distinct morphological features (56), and from modern extinct humans (hunters, farmers) from Mesolithic (Middle Stone Age, ~10,000 yrs BC, (57)) and Neolithic (New Stone Age, ~5,000 BC, (58, 59) periods. Though exhibiting several anatomical features, making archaic hominins different from the modern human, there are studies challenging the idea that reserve symbolism and abstract thinking was an exclusive prerogative of modern human (60, 61). The time Neanderthals used to live in is thought to be associated with the onset of cognitive fluidity involving the capacity to draw analogies (early paintings), to combine concepts (making tools) and to adapt ideas for new contexts (62). Wynn and Coolidge believe that evolution of WM was central to the evolution of human cognitive traits consisted from few genetic mutations that led to “enhanced WM” 200,000-40,000 BC (63). Our work partially supports this idea showing the perseverance of higher WM score-associated alleles across the hominins such as T of rs1105684 and G of rs2274855 (Figure 3D) but a Neolithic appearance of rs2149171 T in Iceman previously found only in mice genome supporting the conclusion made by Crabtree (64) that modern humans as species “are surprisingly intellectually fragile and perhaps reached a peak 2,000–6,000 years ago”. Mesolithic period has been always considered as a key gate for the evolution of human languages (65) with our data showing that rs2218404 G-allele associated with a higher VC score (Figure 1B-1) emerges for the first time in the Loschbour hunter *NTNG1* gene (Figure 3D). VC, as an example of abstract symbol usage, is associated with the global network efficiency (as a part of fronto-parietal network (19,66), and global communication and intellectual performance (67). From this point of view it is not

surprising that appearance of the G allele in Loschbour and Iceman genomes coincides with the presence of PS enhancing rs96501 T allele (Figure 3D). A wealth of data has been collected characterising possible look and health status of archaic hominins and modern but extinct humans (for ref. see (68) and SM: Discussion). Based on our own data we may also speculate that the extinct hominins may have had a lower VC comparing to us, and consequently, Neanderthals were unlikely able for a semantic communication due to a global network inefficiency VC is associated with; they have had similar to us PS (if they had lived beyond the Mesolithic period), and were likely to have had identical to modern human WM, corroborating the advanced evolutionary nature of this important human cognitive domain of a limited capacity and associated with intelligence.

## CONCLUSION

Evolution of a novel function relies on enhanced genetic robustness via functional redundancy potentially provided by a gene duplication event. Further evolutionary outcome depends on the substrate availability (undergoing its own evolution) upon which the novel function(s) exerts its action. Nature does not create but tinkers to perfection provided to it material exploring available evolutionary tools. Half a billion years ago a gene duplication event had provided a plethora of such substrate thus converting the evolution itself into a “Creator” of new functions. Here we have described how a pair of twin genes got themselves involved into the human cognitive functioning believed to be emerged in a primordial state in primitive vertebrates prior to the first recorded gene duplication. Subsequent process of the function specialisation made *NTNG* paralogs to subfunctionalise into distinct cognitive domains in a complementary manner (52).

## MATERIALS AND METHODS

Ethics statement. This study was performed in accordance with the World Medical Association's Declaration of Helsinki and approved by the Osaka University Research Ethics Committee. A written informed consent was obtained from all subjects after the procedures had been fully explained.

Subjects. The procedures were performed as per established protocols at Osaka University as described previously (69). The subjects consisted from 339 patients with SCZ and 716 healthy controls. The sex ratio did not differ significantly between the groups, but the mean age was significantly different. The subjects were all biologically unrelated Japanese and recruited from both outpatient and inpatient units at Osaka University Hospital and other psychiatric hospitals. Each patient with SCZ had been diagnosed by at least two trained psychiatrists based on unstructured clinical interviews, according to the criteria of the DSM-IV (36). In case if the diagnosis of the two trained psychiatrists was discordant, it was resolved through the further negotiations on both specialist opinions. In case of unresolved diagnostic disputes, the patient was omitted from the study. Psychiatrically healthy controls were recruited through local advertisements and were evaluated by means of unstructured interviews to exclude individuals with current or past contact with psychiatric services, those who experienced psychiatric medications, or who were not Japanese. Controls for family history of a CD, such as SCZ, BD, or major depressive disorder were not included. Ethnicity was determined by self-report and was not confirmed by genetic analyses. Additionally, subjects were excluded from this study if they had neurologic or medical conditions that could have potentially affect their central nervous system, such as atypical headaches, head trauma with loss of consciousness, chronic lung disease, kidney disease, chronic hepatic disease, thyroid disease, active cancer, cerebrovascular disease, epilepsy, seizures, substance abuse related disorders, or mental retardation.

SNPs selection, genotyping, and genomic sequencing. This study was designed to examine the association of SCZ patients cognitive performance (through WAIS-III implementation (17)) with *NTNG* genes. Venous blood was collected from the subjects. Genomic DNA was extracted from the whole blood using standard procedures. The SNPs (26-28, 30) were genotyped using the TaqMan allelic discrimination assay (Applied Biosystems, Foster City, CA). No deviations from the Hardy-Weinberg equilibrium in the examined SNPs were detected ( $p > 0.05$ ).

Statistical analysis. The effects of the diagnosis, genotype and their interaction on cognitive performances in the WAIS were analyzed by two-way analyses of covariance (ANCOVA). Diagnosis and genotype statuses were included in the model as independent variables (ST1). FIQ and each WAIS subscale score (VIQ, PIQ, VC, PO, WM, PS, Vc, SiM, IF, CH, AM, DS, LNS, PC, BD, and MR) were included as dependent variables. Sex, age and years of education were treated as covariates, as they were possible confounding factors. All  $p$  values are two tailed, and statistical significance was defined as  $*p < 0.05$  and  $**p < 0.01$ .

Identity percent calculations and the definition of ROIs. The complete procedure is described in the Figures 2-3 legend. Stretcher (70) was used for the alignments (the default values were: gap penalty – 16 (DNA) and 12 (protein), and the extend penalty – 4 (DNA) and 2 (protein)), for the percent identity calculations and evolutionary rates. A ROI's selection was initially defined as a minimal area surrounding a SNP mutation allele incorporating the outmost evolutionary dramatic changes, turns out to be  $\pm 10$  nu.

Mice, primates and hominins *NTNG* paralogs DNA and encoded protein sequences reconstruction. Genomes for mouse (GRC38.p3) and marmoset (C\_jacchus3.2.1) were from Ensemble. Since chimpanzee's genome is based only on a single individual (CHIMP2.1.4, Clint) and contains several questionable information we have reconstructed a consensus genome sequence for both *NTNG* genes based on 25 primate sequences of *Pan troglodytes*

(71). All datasets used for the *NTNG* paralogs DNA and encoded by them proteins reconstruction are listed in ST2. For details refer to SM.

## SUPPLEMENTARY MATERIALS (SM)

Contain additional Results and Discussion, Supplementary Methods (ancient and primate genomes reconstructions), and Supplementary Tables (ST1 and ST2) as a single compiled pdf file. Also included are human Netrin-G1 and Netrin-G2 alignments, as well as 101 nu alignments for all 11 ROIs across the all analysed species.

## ACKNOWLEDGEMENTS

Authors would like to acknowledge the financial support provided by Funding Program for World-Leading Innovative R&D on Science and Technology (FIRST Programme) and KAKENHI 15H04290 by the Japan Society for the Promotion of Science (JSPS).

## COMPETING INTERESTS

Authors would like to express a lack of any competing interests associated with the work.

## REFERENCES

1. Ohno S. 1970. *Evolution by Gene Duplication*. Springer, New York.
2. Nakashiba T, Nishimura S, Ikeda T, Itohara S. 2002. Complementary expression and neurite outgrowth activity of netrin-G subfamily members. *Mechanisms of Development* 111:47-60. doi: [10.1016/S0925-4773\(01\)00600-1](https://doi.org/10.1016/S0925-4773(01)00600-1).
3. Nishimura-Akiyoshi S, Niimi K, Nakashiba T, and Itohara S. 2007. Axonal netrin-Gs transneuronally determine lamina-specific subdendritic segments. *Proceedings of the National Academy of Sciences of the United States of America* 104:14801-14806. doi: [10.1073/pnas.0706919104](https://doi.org/10.1073/pnas.0706919104).
4. Matsukawa H, Akiyoshi-Nishimura S, Zhang Q, Lujan R, Yamaguchi K, Goto H, Yaguchi K, Hashikawa T, Sano C, Shigemoto R, Nakashiba T, Itohara S. 2014. Netrin-G/NGL Complexes Encode Functional Synaptic Diversification. *Journal of Neuroscience* 34:15779-15792. doi: [10.1523/jneurosci.1141-14.2014](https://doi.org/10.1523/jneurosci.1141-14.2014).
5. Sun KLW, Correia JP, Kennedy TE. 2011. Netrins: versatile extracellular cues with diverse functions. *Development* 138:2153-2169. doi: [10.1242/dev.044529](https://doi.org/10.1242/dev.044529).
6. Yu S, Guo Z, Johnson C, Gu G, Wu Q. 2013. Recent progress in synthetic and biological studies of GPI anchors and GPI-anchored proteins. *Current Opinion in Chemical Biology* 17: 1006-1013. doi: [10.1016/j.cbpa.2013.09.016](https://doi.org/10.1016/j.cbpa.2013.09.016).
7. Sevcsik E, Brameshuber M, Foelser M, Weghuber J, Honigsmann A, Schütz GJ. 2015. GPI-anchored proteins do not reside in ordered domains in the live cell plasma membrane. *Nature Communications* 6:A6969. doi: [10.1038/ncomms7969](https://doi.org/10.1038/ncomms7969).
8. Klotzsch E and Schutz GJ. 2013. A critical survey of methods to detect plasma membrane rafts. *Philosophical Transactions of the Royal Society B-Biological Sciences* 368:20120033. doi: [10.1098/rstb.2012.0033](https://doi.org/10.1098/rstb.2012.0033).
9. Abitua PB, Wagner E, Navarrete IA, Levine M. 2012. Identification of a rudimentary

- neural crest in a non-vertebrate chordate. *Nature* 492:104-107. doi: [10.1038/nature11589](https://doi.org/10.1038/nature11589).
10. Stolfi A, Ryan K, Meinertzhagen IA, Christiaen L. 2015. Migratory neuronal progenitors arise from the neural plate borders in tunicates. *Nature* 527:371-374. doi: [10.1038/nature15758](https://doi.org/10.1038/nature15758).
11. Abitua PB, Gainous TB, Kaczmarczyk AN, Winchell CJ, Hudson C, Kamata K, Nakagawa M, Tsuda M, Kusakabe, TG, Levine M. 2015. The pre-vertebrate origins of neurogenic placodes. *Nature* 524:462-465. doi: [10.1038/nature14657](https://doi.org/10.1038/nature14657).
12. Wise SP. 2008. Forward frontal fields: phylogeny and fundamental function. *Trends in Neurosciences* 31:599-608. doi: [10.1016/j.tins.2008.08.008](https://doi.org/10.1016/j.tins.2008.08.008).
13. Preuss TM. 2012. Human brain evolution: From gene discovery to phenotype discovery. *Proceedings of the National Academy of Sciences of the United States of America* 109:10709-10716. doi: [10.1073/pnas.1201894109](https://doi.org/10.1073/pnas.1201894109).
14. Geschwind DH and Rakic P. 2013. Cortical Evolution: Judge the Brain by Its Cover. *Neuron* 80:633-647. doi: [10.1016/j.neuron.2013.10.045](https://doi.org/10.1016/j.neuron.2013.10.045).
15. Belmonte JCI, Callaway EM, Churchland P, Caddick SJ, Feng G, Homanics GE, Lee K-F, Leopold DA, Miller CT, Mitchell JF, Mitalipov S, Moutri AR, Movshon JA, Okano H, Reynolds JH, Ringach D, Sejnowski TJ, Silva AC, Strick PL, Wu J, Zhang F. 2015. Brains, Genes, and Primates. *Neuron* 86:617-631. doi: [10.1016/j.neuron.2015.03.021](https://doi.org/10.1016/j.neuron.2015.03.021).
16. Joshi PK, Esko T, Mattsson H, Eklund N, Gandin I, Nutile T, Jackson AU, Schurmann C, Smith AV, Zhang W, Okada Y, Stančáková A, Faul JD, Zhao W, Bartz TM, Concas MP, Franceschini N, Enroth S, Vitart V, Trompet S, Guo X, Chasman DI, O'Connel JR, Corre T, Nongmaithem SS, Chen Y, Mangino M, Ruggiero D, Traglia M, Farmaki A-E, Kacprowski T, Bjornes A, van der Spek A, Wu Y, Giri AK, Yanek LR, Wang L, Hofer E, Rietveld CA, McLeod O, Cornelis MC, Pattaro C, Verweij N, Baumbach C, Abdellaoui A, Warren HR, Vuckovic D, Mei H, Bouchard C, Perry JRB, Cappellani S, Mirza SS, Benton

434 MC, Broeckel U, Medland SE, Lind PA, Malerba G, Drong A, Yengo L, Bielak LF, Zhi D,  
435 van der Most PJ, Shriner D, Maegi R, Hemani G, Karaderi T, Wang Z, Liu T, Demuth I,  
436 Zhao JH, Meng W, Lataniotis L, van der Laan SW, Bradfield JP, Wood AR, Bonnefond  
437 A, Ahluwalia TS, Hall LM, Salvi E, Yazar S, Carstensen L, de Haan HG, Abney M, Afzal  
438 U, Allison MA, Amin N, Asselbergs FW, Bakker SJL, Barr RG, Baumeister SE, Benjamin  
439 DJ, Bergmann S, Boerwinkle E, Bottinger EP, Campbell A, Chakravarti A, Chan Y,  
440 Chanock SJ, Chen C, Chen Y-DI, Collins FS, Connell J, Correa A, Cupples LA, Smith  
441 GD, Davies G, Dörr M, Ehret G, Ellis SB, Feenstra B, Feitosa MF, Ford I, Fox CS,  
442 Frayling TM, Friedrich N, Geller F, Generation Scotland, Gillham-Nasanya I, Gottesman  
443 O, Graff M, Grodstein F, Gu C, Haley C, Hammond CJ, Harris SE, Harris TB, Hastie ND,  
444 Heard-Costa NL, Heikkilä K, Hocking LJ, Homuth G, Hottenga J-J, Huang J, Huffman JE,  
445 Hysi PG, Ikram MA, Ingelsson E, Joensuu A, Johansson Å, Jousilahti P, Jukema JW,  
446 Kähönen M, Kamatani Y, Kanoni S, Kerr SM, Khan NM, Koellinger P, Koistinen HA,  
447 Kooner MK, Kubo M, Kuusisto J, Lahti J, Launer LJ, Lea RA, Lehne B, Lehtimäki T,  
448 Liewald DCM, Lind L, Loh M, Lokki M-L, London SJ, Loomis SJ, Loukola A, Lu Y,  
449 Lumley T, Lundqvist A, Männistö S, Marques-Vidal P, Masciullo C, Matchan A, Mathias  
450 RA, Matsuda K, Meigs JB, Meisinger C, Meitinger T, Menni C, Mentch FD, Mihailov E,  
451 Milani L, Montasser ME, Montgomery GW, Morrison A, Myers RH, Nadukuru R,  
452 Navarro P, Nelis M, Nieminen MS, Nolte IM, O'Connor GT, Ogunniyi A, Padmanabhan S,  
453 Palmas WR, Pankow JS, Patarcic I, Pavani F, Peyser PA, Pietilainen K, Poulter N,  
454 Prokopenko I, Ralhan S, Redmond P, Rich SS, Rissanen H, Robino A, Rose LM, Rose R,  
455 Sala C, Salako B, Salomaa V, Sarin A-P, Saxena R, Schmidt H, Scott LJ, Scott WR,  
456 Sennblad B, Seshadri S, Sever P, Shrestha S, Smith BH, Smith JA, Soranzo N,  
457 Sotoodehnia N, Southam L, Stanton AV, Stathopoulou MG, Strauch K, Strawbridge RJ,  
458 Suderman MJ, Tandon N, Tang S-T, Taylor KD, Tayo BO, Töglhofer AM, Tomaszewski

M, Tšernikova N, Tuomilehto J, Uitterlinden AG, Vaidya D, van Hylckama Vlieg A, van Setten J, Vasankari T, Vedantam S, Vlachopoulou E, Vozzi D, Vuoksima E, Waldenberger M, Ware EB, Wentworth-Shields W, Whitfield JB, Wild S, Willemssen G, Yajnik CS, Yao J, Zaza G, Zhu X, The BioBank Japan Project, Salem RM, Melbye M, Bisgaard H, Samani NJ, Cusi D, Mackey DA, Cooper RS, Froguel P, Pasterkamp G, Grant SFA, Hakonarson H, Ferrucci L, Scott RA, Morris AD, Palmer CAN, Dedoussis G, Deloukas P, Bertram L, Lindenberg U, Berndt SI, Lindgren CM, Timpson NJ, Toenjes A, Munroe PB, Sørensen TIA, Rotimi CN, Arnett DK, Oldehinkel AJ, Kardia SLR, Balkau B, Gambaro G, Morris AP, Eriksson JG, Wright MJ, Martin NG, Hunt SC, Starr JM, Deary IJ, Griffiths LR, Tiemeier H, Pirastu N, Kaprio J, Wareham NJ, Pérusse L, Wilson JG, Girotto G, Caulfield MJ, Raitakari O, Boomsma DI, Gieger C, van der Harst Pim, Hicks AA, Kraft P, Sinisalo J, Knekt P, Johannesson M, Magnusson PKE, Hamsten A, Schmidt R, Borecki IB, Vartiainen E, Becker DM, Bharadwaj D, Mohlke KL, Boehnke M, van Duijn CM, Sanghera DK, Teumer A, Zeggini E, Metspalu A, Gasparini P, Ulivi S, Ober C, Toniolo D, Rudan I, Porteous DJ, Ciullo M, Spector TD, Hayward C, Dupuis J, Loos RJJ, Wright AF, Chandak GR, Vollenweider P, Shuldiner AR, Ridker PM, Rotter JJ, Sattar N, Gyllenstein U, North KE, Pirastu M, Psaty BM, Weir DR, Laakso M, Gudnason V, Takahashi A, Chambers JC, Kooner JS, Strachan DP, Campbell H, Hirschhorn JN, Perola M, Polašek O, Wilson JF. 2015. Directional dominance on stature and cognition in diverse human populations. *Nature* 523:459-462. doi: [10.1038/nature14618](https://doi.org/10.1038/nature14618).

17. Wechsler D. 1958. *The Measurement And Appraisal Of Adult Intelligence*, 4th edition. The Williams & Wilkins Company. 324 pp.

18. Deary IJ, Spinath FM, Bates TC. 2006. Genetics of intelligence. *European Journal of Human Genetics* 14:690-700. doi: [10.1038/sj.ejhg.5201588](https://doi.org/10.1038/sj.ejhg.5201588).

19. Glascher J, Tranel D, Paul LK, Rudrauf D, Rorden C, Hornaday A, Grabowski T,

- 484      Damasio H, Adolphs R. 2009. Lesion Mapping of Cognitive Abilities Linked to  
485      Intelligence. *Neuron* 61:681-691. doi: [10.1016/j.neuron.2009.01.026](https://doi.org/10.1016/j.neuron.2009.01.026).
- 486      20. Spearman C. 1904. "General intelligence" objectively determined and measured.  
487      *American Journal of Psychology* 15:201-292. doi: [10.2307/1412107](https://doi.org/10.2307/1412107).
- 488      21. Hampshire A, Highfield RR, Parkin BL, Owen AM. 2012. Fractionating Human  
489      Intelligence. *Neuron* 76:1225-1237. doi: [10.1016/j.neuron.2012.06.022](https://doi.org/10.1016/j.neuron.2012.06.022).
- 490      22. Lett TA, Voineskos AN, Kennedy JL, Levine B, Daskalakis ZJ. 2014. Treating working  
491      memory deficits in schizophrenia: a review of the neurobiology. *Biological Psychiatry*  
492      75:361-170. doi: [10.1016/j.biopsych.2013.07.026](https://doi.org/10.1016/j.biopsych.2013.07.026).
- 493      23. Forbes NF, Carrick LA, McIntosh AM, Lawrie SM. 2009. Working memory in  
494      schizophrenia: a meta-analysis. *Psychological Medicine* 39:889-905. doi:  
495      [10.1017/s0033291708004558](https://doi.org/10.1017/s0033291708004558).
- 496      24. Leeson VC, Robbins TW, Matheson E, Hutton SB, Ron MA, Barnes TRE, Joyce EM.  
497      2009. Discrimination Learning, Reversal, and Set-Shifting in First-Episode Schizophrenia:  
498      Stability Over Six Years and Specific Associations with Medication Type and  
499      Disorganization Syndrome. *Biological Psychiatry* 66:586-593. doi:  
500      [10.1016/j.biopsych.2009.05.016](https://doi.org/10.1016/j.biopsych.2009.05.016).
- 501      25. Barnett JH, Robbins TW, Leeson VC, Sahakian BJ, Joyce EM, Blackwell AD. 2010.  
502      Assessing cognitive function in clinical trials of schizophrenia. *Neuroscience and*  
503      *Biobehavioral Reviews* 34:1161-1177. doi: [10.1016/j.neubiorev.2010.01.012](https://doi.org/10.1016/j.neubiorev.2010.01.012).
- 504      26. Fukasawa M, Aoki M, Yamada K, Iwayama-Shigeno Y, Takao H, Meerabux J, Toyota T,  
505      Nishikawa T, Yoshikawa T. 2004. Case-control association study of human netrin G1  
506      gene in Japanese schizophrenia. *Journal of Medical and Dental Sciences* 51:121-128.
- 507      27. Aoki-Suzuki M, Yamada K, Meerabux J, Iwayama-Shigeno Y, Ohba H, Iwamoto K,  
508      Takao H, Toyota T, Suto Y, Nakatani N, Dean B, Nishimura S, Seki K, Kato T, Itohara S,

- 509 Nishikawa T, Yoshikawa, T. 2005. A Family-Based Association Study and Gene  
510 Expression Analyses of Netrin-G1 and -G2 Genes in Schizophrenia. *Biological Psychiatry*  
511 57:382–393. doi: [10.1016/j.biopsych.2004.11.022](https://doi.org/10.1016/j.biopsych.2004.11.022).
- 512 28. The Japanese Schizophrenia Sib-Pair Linkage Group (JSSLG), Arinami T, Ohtsuki T,  
513 Ishiguro H, Ujike H, Tanaka Y, Morita Y, Mineta M, Takeichi M, Yamada S, Imamura A,  
514 Ohara K, Shibuya H, Ohara, K, Suzuki Y, Muratake T, Kaneko N, Someya T, Inada T,  
515 Yoshikawa T, Toyota T, Yamada K, Kojima T, Takahashi S, Osamu O, Shinkai T,  
516 Nakamura M, Fukuzako H, Hashiguchi T, Niwa S, Ueno T, Tachikawa H, Hori T, Asada T,  
517 Nanko S, Kunugi H, Hashimoto R, Ozaki N, Iwata N, Harano M, Arai H, Ohnuma T,  
518 Kusumi I, Koyama T, Yoneda H, Fukumaki Y, Shibata H, Kaneko S, Higuchi H, Yasui-  
519 Furukori N, Numachi Y, Itokawa M, Okazaki Y. 2005. Genomewide high-density SNP  
520 linkage analysis of 236 Japanese families supports the existence of schizophrenia  
521 susceptibility loci on chromosomes 1p, 14q, and 20p. *American Journal of Human*  
522 *Genetics* 77:937-944. doi: [10.1086/498122](https://doi.org/10.1086/498122).
- 523 29. Eastwood SL, Harrison PJ. 2008. Decreased mRNA expression of netrin-G1 and netrin-  
524 G2 in the temporal lobe in schizophrenia and bipolar disorder. *Neuropsychopharmacology*  
525 33:933-945. doi: [10.1038/sj.npp.1301457](https://doi.org/10.1038/sj.npp.1301457).
- 526 30. Ohtsuki T, Horiuchi Y, Koga M, Ishiguro H, Inada T, Iwata N, Ozaki N, Ujike H,  
527 Watanabe Y, Someya T, Arinami T. 2008. Association of polymorphisms in the haplotype  
528 block spanning the alternatively spliced exons of the *NTNG1* gene at 1p13.3 with  
529 schizophrenia in Japanese populations. *Neuroscience Letters* 435:194-197. doi:  
530 [10.1016/j.neulet.2008.02.053](https://doi.org/10.1016/j.neulet.2008.02.053).
- 531 31. Zakharyan R, Boyajyan A, Arakelyan A, Gevorgyan A, Mrazek F, Petrek M. 2011.  
532 Functional variants of the genes involved in neurodevelopment and susceptibility to  
533 schizophrenia in an Armenian population. *Human Immunology* 72:746-748. doi:

[10.1016/j.humimm.2011.05.018](https://doi.org/10.1016/j.humimm.2011.05.018).

32. Zhu Y, Yang H, Bi Y, Zhang Y, Zhen C, Xie S, Qin H, He J, Liu L, Liu Y. 2011. Positive association between *NTNG1* and schizophrenia in Chinese Han population. *Journal of Genetics* 90:499-502.
33. Ayalew M, Le-Niculescu H, Levey DF, Jain N, Changala B, Patel SD, Winiger E, Breier A, Shekhar A, Amdur R, Koller D, Nurnberger JI, Corvin A, Geyer M, Tsuang MT, Salomon D, Schork NJ, Fanous AH, O'Donovan MC, Niculescu AB. 2012. Convergent functional genomics of schizophrenia: from comprehensive understanding to genetic risk prediction. *Molecular Psychiatry* 17:887-905. doi: [10.1038/mp.2012.37](https://doi.org/10.1038/mp.2012.37).
34. Wilcox JA and Quadri S. 2014. Replication of NTNG1 association in schizophrenia. *Psychiatric Genetics* 24:266-268. doi: [10.1097/ypg.0000000000000061](https://doi.org/10.1097/ypg.0000000000000061).
35. Nakashiba T, Ikeda T, Nishimura S, Tashiro K, Honjo T, Culotti JG, Itohara, S. 2000. Netrin-G1: a Novel Glycosyl Phosphatidylinositol-Linked Mammalian Netrin That Is Functionally Divergent from Classical Netrins. *The Journal of Neuroscience* 20:6540-6550.
36. APA (American Psychiatric Association). 2013. Diagnostic and Statistical Manual of Mental Disorders (DSM-V®), Fifth Edition. 991 pp. doi: [10.1176/appi.books.9780890425596](https://doi.org/10.1176/appi.books.9780890425596).
37. Yoon JH, Sheremata SL, Rokem A, Silver MA. 2014. Windows to the soul: vision science as a tool for studying biological mechanisms of information processing deficits in schizophrenia. *Frontiers in Psychology* 4:A681. doi: [10.3389/fpsyg.2014.00681](https://doi.org/10.3389/fpsyg.2014.00681).
38. John B and Lewis KR. 1966. Chromosome variability and geographic distribution in insects. *Science* 152:711–721. doi: [10.1126/science.152.3723.711](https://doi.org/10.1126/science.152.3723.711).
39. Gottesman II and McGue M. 2015. Endophenotype. In *The Encyclopedia of Clinical Psychology*, First Edition. Edited by Cautin RL and Lilienfeld SO. JohnWiley & Sons, Inc. doi: [10.1002/9781118625392.wbecp423](https://doi.org/10.1002/9781118625392.wbecp423).

40. Glahn DC, Knowles EE, McKay DR, Sprooten E, Raventós H, Blangero J, Gottesman I, Almas L. 2014. Arguments for the Sake of Endophenotypes: Examining Common Misconceptions About the Use of Endophenotypes in Psychiatric Genetics. *American Journal of Medical Genetics Part B* 165B:122–130. doi: [10.1002/ajmg.b.32221](https://doi.org/10.1002/ajmg.b.32221).
41. Frydecka D, Eissa AM, Hewedi DH, Ali M, Drapała J, Misiak B, Kłosińska E, Phillips JR, Moustafa AA. 2014. Impairments of working memory in schizophrenia and bipolar disorder: the effect of history of psychotic symptoms and different aspects of cognitive task demands. *Frontiers in Behavioral Neuroscience* 8:A416. doi: [10.3389/fnbeh.2014.00416](https://doi.org/10.3389/fnbeh.2014.00416).
42. Baddeley A. 1992. Working memory. *Science* 255:556-559. doi:[10.1126/science.1736359](https://doi.org/10.1126/science.1736359).
43. Mackintosh NJ. 2011. "History of theories and measurement of Intelligence". In "The Cambridge Handbook of Intelligence". Edited by Sternberg RJ, Kaufman SB. p. 3-19. doi: [10.1017/CBO9780511977244](https://doi.org/10.1017/CBO9780511977244).
44. del Rosario RCH, Rayan NA, Prabhakar S. 2014. Noncoding Origins of Anthropoid Traits and a New Null Model of Transposon Functionalization. *Genome Research* 24:1469-1484. doi: [10.1101/gr.168963.113](https://doi.org/10.1101/gr.168963.113).
45. Kellis M, Wold B, Snyder MP, Bernstein BE, Kundaje A, Marinov GK, Ward LD, Birney E, Crawford GE, Dekker J, Dunham I, Elnitski LL, Farnham PJ, Feingold EA, Gerstein M, Giddings MC, Gilbert DM, Gingeras TR, Green ED, Guigo R, Hubbard T, Kent J, Lieb JD, Myers RM, Pazin MJ, Ren B, Stamatoyannopoulos JA, Weng Z, White KP, Hardison RC. 2014. Defining functional DNA elements in the human genome. *Proceedings of the National Academy of Sciences of the United States of America* 111:6131-6138. doi: [10.1073/pnas.1318948111](https://doi.org/10.1073/pnas.1318948111).
46. Hemani G, Shakhbazov K, Westra H-J, Esko T, Henders AK, McRae AF, Yang J, Gibson G, Martin NG, Metspalu A, Franke L, Montgomery GW, Visscher PM, Powell JE. 2014.

- Detection and replication of epistasis influencing transcription in humans. *Nature* 508:249–253. doi: [10.1038/nature13005](https://doi.org/10.1038/nature13005).
47. Plomin R and Deary IJ. 2015. Genetics and intelligence differences: five special findings. *Molecular Psychiatry* 20:98-108. doi: [10.1038/mp.2014.105](https://doi.org/10.1038/mp.2014.105).
48. Benjamin B, Pourcain BSt, Davis OS, Davies G, Hansell NK, Brion M-JA, Kirkpatrick RM, Cents RAM, Franic S, Miller MB, Haworth CMA, Meaburn E, Price TS, Evans DM, Timpson N, Kemp J, Ring S, McArdle W, Medland SE, Yang J, Harris SE, Liewald DC, Scheet P, Xiao X, Hudziak JJ, de Geus EJC, Wellcome Trust Case Control Consortium 2 (WTCCC2), Jaddoe VWV, Starr JM, Verhulst FC, Pennell C, Tiemeier H, Iacono WG, Palmer LJ, Montgomery GW, Martin NG, Boomsma DI, Posthuma D, McGue M, Wright MJ, Davey Smith G, Deary IJ, Plomin R, Visscher PM. 2014. Childhood intelligence is heritable, highly polygenic and associated with *FBNPIL*. *Molecular Psychiatry* 19:253-258. doi: [10.1038/mp.2012.184](https://doi.org/10.1038/mp.2012.184).
49. Desrivieres S, Lourdasamy A, Tao C, Toro R, Jia T, Loth E, Medina LM, Kepa A, Fernandes A, Ruggeri B, Carvalho FM, Cocks G, Banaschewski T, Barker GJ, Bokde ALW, Büchel C, Conrod PJ, Flor H, Heinz A, Gallinat J, Garavan H, Gowland P, Brühl R, Lawrence C, Mann K, Martinot MLP, Nees F, Lathrop M, Poline J-B, Rietschel M, Thompson P, Fauth-Bühler M, Smolka MN, Pausova Z, Paus T, Feng J, Schumann G and the IMAGEN Consortium. 2015. Single nucleotide polymorphism in the neuroplastin locus associates with cortical thickness and intellectual ability in adolescents. *Molecular Psychiatry* 20: 263-274. doi: [10.1038/mp.2013.197](https://doi.org/10.1038/mp.2013.197).
50. Davies G, Tenesa A, Payton A, Yang J, Harris SE, Liewald D, Ke X, Hellard SLe, Christoforou A, Luciano M, McGhee K, Lopez L, Gow AJ, Corley J, Redmond P, Fox HC, Haggarty P, Whalley LJ, McNeill G, Goddard ME, Espeseth T, Lundervold AJ, Reinvang I, Pickles A, Steen VM, Ollier W, Porteous DJ, Horan M, Starr JM, Pendleton N, Visscher

609 PM, Deary IJ. 2011. Genome-wide association studies establish that human intelligence is  
610 highly heritable and polygenic. *Molecular Psychiatry* 16:996-1005. doi:  
611 [10.1038/mp.2011.85](https://doi.org/10.1038/mp.2011.85).

612 51. Rietveld CA, Medland SE, Derringer J, Yang J, Esko T, Martin NW, Westra HJ,  
613 Shakhbazov K, Abdellaoui A, Agrawal A, Albrecht E, Alizadeh BZ, Amin N, Bamard J,  
614 Baumeister SE, Benke KS, Bielak LF, Boatman JA, Boyle PA, Davies G, de Leeuw C,  
615 Eklund N, Evans DS, Ferhmann R, Fischer K, Gieger C, Gjessing HK, Hägg S, Harris JR,  
616 Hayward C, Holzapfel C, Ibrahim-Verbaas CA, Ingelsson E, Jacobsson B, Joshi PK,  
617 Jugessur A, Kaakinen M, Kanoni S, Karjalainen J, Kolcic I, Kristiansson K, Kutalik Z,  
618 Lahti J, Lee SH, Lin P, Lind PA, Liu YM, Lohman K, Loitfelder M, McMahon G, Vidal  
619 PM, Meirelles O, Milani L, Myhre R, Nuotio ML, Oldmeadow CJ, Petrovic KE, Peyrot  
620 WJ, Polašek O, Quaye L, Reinmaa E, Rice JP, Rizzi TS, Schmidt H, Schmidt R, Smith  
621 AV, Smith JA, Tanaka T, Terracciano A, van der Loos MJHM, Vitart V, Völzke H,  
622 Wellmann J, Yu L, Zhao W, Allik J, Attia JR, Bandinelli S, Bastardot F, Beauchamp J,  
623 Bennett DA, Berger K, Bierut LJ, Boomsma DI, Bültmann U, Campbell H, Chabris CF,  
624 Cherkas L, Chung MK, Cucca F, de Andrade M, De Jager PL, De Neve J-E, Deary IJ,  
625 Dedoussis GV, Deloukas P, Dimitriou M, Eiríksdóttir G, Elderson MF, Eriksson JG,  
626 Evans DM, Faul JD, Ferrucci L, Garcia ME, Grönberg H, Guonason V, Hall P, Harris JM,  
627 Harris TB, Hastie ND, Heath AC, Hernandez DG, Hoffmann W, Hofman A, Holle R,  
628 Holliday EG, Hottenga JJ, Iacono WG, Illig T, Järvelin MR, Kähönen M, Kaprio J,  
629 Kirkpatrick RM, Kowgier M, Latvala A, Launer LJ, Lawlor DA, Lehtimäki T, Li JM,  
630 Lichtenstein P, Lichtner P, Liewald DC, Madden PA, Magnusson PKE, Mäkinen TE,  
631 Masala M, McGue M, Metspalu A, Mielck A, Miller MB, Montgomery GW, Mukherjee S,  
632 Nyholt DR, Oostra BA, Palmer LJ, Palotie A, Penninx B, Perola M, Peyser PA, Preisig M,  
633 Räikkönen K, Raitakari OT, Realo A, Ring SM, Ripatti S, Rivadeneira F, Rudan I,

- Rustichini A, Salomaa V, Sarin AP, Schlessinger D, Scott RJ, Snieder H, St Pourcain B, Starr JM, Sul JH, Surakka I, Svento R, Teumer A, The LifeLines Cohort Study, Tiemeier H, van Rooij FJA, Van Wagoner DR, Vartiainen E, Viikari J, Vollenweider P, Vonk JM, Waeber G, Weir DR, Wichmann H-E, Widen E, Willemsen G, Wilson JF, Wright AF, Conley D, Davey-Smith G, Franke L, Groenen PJF, Johannesson M, Kardina SLR, Krueger RF, Laibson D, Martin NG, Meyer MN, Posthuma D, Thurik AR, Timpson NJ, Uitterlinden AG, van Duijn CM, Visscher PM, Benjamin DJ, Cesarini D, Koellinger PD. 2013. GWAS of 126,559 Individuals Identifies Genetic Variants Associated with Educational Attainment. *Science* 340:1467-1471. doi: [10.1126/science.1235488](https://doi.org/10.1126/science.1235488).
52. Prosser P, Polygalov D, Zhang Q, McHugh TJ, Itohara S. 2015. Cognitive Domains function complementation by *NTNG* gene paralogs. *bioRxiv* doi: <http://dx.doi.org/10.1101/034413>.
53. Prabhakar S, Noonan JP, Pääbo S, Rubin EM. 2006. Accelerated evolution of conserved noncoding sequences in humans. *Science* 314:786-786. doi: [10.1126/science.1130738](https://doi.org/10.1126/science.1130738).
54. Rubinstein M and de Souza FSJ. 2013. Evolution of transcriptional enhancers and animal diversity. *Philosophical Transactions of the Royal Society B-Biological Sciences* 368:A20130017. doi: [10.1098/rstb.2013.0017](https://doi.org/10.1098/rstb.2013.0017).
55. Harmston N, Baresic A, Lenhard B. 2013. The mystery of extreme non-coding conservation. *Philosophical Transactions of the Royal Society B-Biological Sciences* 368:A20130021. doi: [10.1098/rstb.2013.0021](https://doi.org/10.1098/rstb.2013.0021).
56. Meyer M, Kircher M, Gansauge MT, Li H, Racimo F, Mallick S, Schraiber JG, Jay F, Prüfer K, de Filippo C, Sudmant PH, Alkan C, Fu QM, Do R, Rohland N, Tandon A, Siebauer M, Green RE, Bryc K, Briggs AW, Stenzel U, Dabney J, Shendure J, Kitzman J, Hammer MF, Shunkov MV, Derevianko AP, Patterson N, Andrés AM, Eichler EE, Slatkin M, Reich D, Kelso J, Pääbo S. 2012. A High-Coverage Genome Sequence from an

- 659 Archaic Denisovan Individual. *Science* 338:222-226. doi: [10.1126/science.1224344](https://doi.org/10.1126/science.1224344).
- 660 57. Lazaridis I, Patterson N, Mittnik A, Renaud G, Mallick S, Kirsanow K, Sudmant PH,  
661 Schraiber JG, Castellano S, Lipson M, Berger B, Economou C, Bollongino R, Fu Q, Bos  
662 KI, Nordenfelt S, Li H, de Filippo C, Prüfer K, Sawyer S, Posth C, Haak W, Hallgren F,  
663 Fornander E, Rohland N, Delsate D, Francken M, Guinet J-M, Wahl J, Ayodo G, Babiker  
664 HA, Bailliet G, Balanovska E, Balanovsky O, Barrantes R, Bedoya G, Ben-Ami H, Bene J,  
665 Berrada F, Bravi CM, Brisighelli F, Busby GBJ, Cali F, Churnosov M, Cole David EC,  
666 Corach D, Damba L, van Driem G, Dryomov S, Dugoujon J-M, Fedorova SA, Romero IG,  
667 Gubina M, Hammer M, Henn BM, Hervig T, Hodoglugil U, Jha AR, Karachanak-  
668 Yankova S, Khusainova R, Khusnutdinova E, Kittles R, Kivisild T, Klitz W, Kučinskis V,  
669 Kushniarevich A, Laredj L, Litvinov S, Loukidis T, Mahley RW, Melegh B, Metspalu E,  
670 Molina J, Mountain J, Näkkäläjärvi K, Nesheva D, Nyambo T, Osipova L, Parik J,  
671 Platonov F, Posukh O, Romano V, Rothhammer F, Rudan I, Ruizbakiev R, Sahakyan H,  
672 Sajantila A, Salas A, Starikovskaya EB, Tarekegn A, Toncheva D, Turdikulova S,  
673 Uktveryte I, Utevska O, Vasquez R, Villena M, Voevoda M, Winkler CA, Yepiskoposyan  
674 L, Zalloua P, Zemunik T, Cooper A, Capelli C, Thomas MG, Ruiz-Linares A, Tishkoff  
675 SA, Singh L, Thangaraj K, Vilems R, Comas D, Sukernik R, Metspalu M, Meyer M,  
676 Eichler EE, Burger J, Slatkin M, Pääbo S, Kelso J, Reich D, Krause J. 2014. Ancient  
677 human genomes suggest three ancestral populations for present-day Europeans. *Nature*  
678 513:409-413. doi: [10.1038/nature13673](https://doi.org/10.1038/nature13673).
- 679 58. Keller A, Graefen A, Ball M, Matzas M, Boisguerin V, Maixner F, Leidinger P, Backes C,  
680 Khairat R, Forster M, Stade B, Franke A, Mayer J, Spangler J, McLaughlin S, Shah M,  
681 Lee C, Harkins TT, Sartori A, Moreno-Estrada A, Henn B, Sikora M, Semino O, Chiaroni  
682 J, Rootsi S, Myres NM, Cabrera VM, Underhill PA, Bustamante CD, Vigl EE, Samadelli  
683 M, Cipollini G, Haas J, Katus H, O'Connor BD, Carlson MRJ, Meder B, Blin N, Meese E,

- 684 Pusch CM, Zink A. 2012. New insights into the Tyrolean Iceman's origin and phenotype  
685 as inferred by whole-genome sequencing. *Nature Communications* 3:A698. doi:  
686 [10.1038/ncomms1701](https://doi.org/10.1038/ncomms1701).
- 687 59. Rasmussen M, Li YR, Lindgreen S, Pedersen JS, Albrechtsen A, Moltke I, Metspalu M,  
688 Metspalu E, Kivisild T, Gupta R, Bertalan M, Nielsen K, Gilbert MTP, Wang Y,  
689 Raghavan M, Campos PF, Kamp HM, Wilson AS, Gledhill A, Tridico S, Bunce M,  
690 Lorenzen ED, Binladen J, Guo XS, Zhao J, Zhang XQ, Zhang H, Li Z, Chen MF, Orlando  
691 L, Kristiansen K, Bak M, Tommerup N, Bendixen C, Pierre TL, Grønnow B, Meldgaard  
692 M, Andreassen C, Fedorova SA, Osipova LP, Higham TFG, Ramsey CB, Hansen TVO,  
693 Nielsen FC, Crawford MH, Brunak S, Sicheritz-Pontén T, Villemis R, Nielsen R, Krogh A,  
694 Wang J, Willerslev E. 2010. Ancient human genome sequence of an extinct Palaeo-  
695 Eskimo. *Nature* 463:757-762. doi: [10.1038/nature08835](https://doi.org/10.1038/nature08835).
- 696 60. Appenzeller T. 2013. Old masters. *Nature* 497: 302-304.
- 697 61. Wong K. 2015. Neandertal Minds. *Scientific American* 312:36-43. doi:  
698 [10.1038/scientificamerican0215-36](https://doi.org/10.1038/scientificamerican0215-36).
- 699 62. Gabora L and Russon A. 2011. "The evolution of Intelligence". In "The Cambridge  
700 Handbook of Intelligence". Edited by Sternberg RJ, Kaufman SB. p. 328-350.
- 701 63. Balter M. 2010. Did Working Memory Spark Creative Culture? *Science* 328:160-163.  
702 doi: [10.1126/science.328.5975.160](https://doi.org/10.1126/science.328.5975.160).
- 703 64. Crabtree GR. 2013. Our fragile intellect. Part I. *Trends in Genetics* 29:1-3. doi:  
704 [10.1016/j.tig.2012.10.002](https://doi.org/10.1016/j.tig.2012.10.002).
- 705 65. Haak W, Lazardis I, Patterson N, Rohland N, Mallick S, Llamas B, Brandt G, Nordenfelt  
706 S, Harney E, Stewardson K, Fu Q, Mittnik A, Bánffy E, Economou C, Francken M,  
707 Friederich S, Pena RG, Hallgren F, Khartanovich V, Khokhlov A, Kunst M, Kuznetsov P,  
708 Meller H, Mochalov O, Moiseyev V, Nicklisch N, Pichler SL, Risch R, Guerra MAR,

- Roth C, Szécsényi-Nagy A, Wahl J, Meyer M, Krause J, Brown D, Anthony D, Cooper A, Alt KW, Reich D. 2015. Massive migration from the steppe was a source for Indo-European languages in Europe. *Nature* 522:207-211. doi: [10.1038/nature14317](https://doi.org/10.1038/nature14317).
66. Song M, Zhou Y, Li J, Liu Y, Tian L, Yu C, Tianzi, J. 2008. Brain spontaneous functional connectivity and intelligence. *Neuroimage* 41:1168-1176. doi: [10.1016/j.neuroimage.2008.02.036](https://doi.org/10.1016/j.neuroimage.2008.02.036).
67. Pamplona GSP, Neto GSS, Rosset SRE, Rogers BP, Salmon CEG. 2015. Analyzing the association between functional connectivity of the brain and intellectual performance. *Frontiers in Human Neuroscience* 9:A61. doi: [10.3389/fnhum.2015.00061](https://doi.org/10.3389/fnhum.2015.00061).
68. Sarkissian CD, Allentoft ME, Ávila-Arcos MC, Barnett R, Campos PF, Cappellini E, Ermini L, Fernández R, da Fonseca R, Ginolhac A, Hansen AJ, Jónsson H, Korneliussen T, Margaryan A, Martin MD, Moreno-Mayar JV, Raghavan M, Rasmussen M, Velasco MS, Schroeder H, Schubert M, Seguin-Orlando A, Wales N, Gilbert MTP, Willerslev E, Orlando L. 2015. Ancient genomics. *Philosophical Transactions of the Royal Society B-Biological Sciences* 370:20130387. doi: [10.1098/rstb.2013.0387](https://doi.org/10.1098/rstb.2013.0387).
69. Ohi K, Hashimoto R, Nakazawa T, Okada T, Yasuda Y, Yamamori H, Fukumoto M, Umeda-Yano S, Iwase M, Kazui H, Yamamoto T, Kano M, Takeda M. 2012. The p250GAP Gene Is Associated with Risk for Schizophrenia and Schizotypal Personality Traits. *PLoS One*:e35696. doi: [10.1371/journal.pone.0035696](https://doi.org/10.1371/journal.pone.0035696).
70. McWilliam H, Li W, Uludag M, Squizzato S, Park YM, Buso N, Cowley AP, Lopez R. 2013. Analysis Tool Web Services from the EMBL-EBI. *Nucleic Acids Research* 41:597-600. doi: [10.1093/nar/gkt376](https://doi.org/10.1093/nar/gkt376).
71. Prado-Martinez J, Sudmant PH, Kidd JM, Li H, Kelley JL, Lorente-Galdos B, Veeramah KR, Woerner AE, O'Connor TD, Santpere G, Cagan A, Theunert C, Casals F, Laayouni H, Munch K, Hobolth A, Halager AE, Malig M, Hernandez-Rodriguez J, Hernando-Herraez I,

- Prüfer K, Pybus M, Johnstone L, Lachmann M, Alkan C, Twigg D, Petit N, Baker C, Hormozdiari F, Fernandez-Callejo M, Dabad M, Wilson ML, Stevison L, Camprubí C, Carvalho T, Ruiz-Herrera A, Vives L, Mele M, Abello T, Kondova I, Bontrop RE, Pusey A, Lankester F, Kiyang JA, Bergl RA, Lonsdorf E, Myers S, Ventura M, Gagneux P, Comas D, Siegismund H, Blanc J, Agueda-Calpena L, Gut M, Fulton L, Tishkoff SA, Mullikin JC, Wilson RK, Gut IG, Gonder MK, Ryder OA, Hahn BH, Navarro A, Akey JM, Bertranpetit J, Reich D, Mailund T, Schierup MH, Hvilsom C, Andrés AM, Wall JD, Bustamante CD, Hammer MF, Eichler EE, Marques-Bonet T. 2013. Great ape genetic diversity and population history. *Nature* 499:471-475. doi: [10.1038/nature12228](https://doi.org/10.1038/nature12228).
72. Green RE, Krause J, Briggs AW, Maricic T, Stenzel U, Kircher M, Patterson N, Li H, Zhai W, Fritz MH-Y, Hansen NF, Durand EY, Malaspina A-S, Jensen JD, Marques-Bonet T, Alkan C, Prüfer K, Meyer M, Burbano HA, Good JM, Schultz R, Aximu-Petri A, Butthof A, Höber B, Höffner B, Siegemund M, Weihmann A, Nusbaum C, Lander ES, Russ C, Novod N, Affourtit J, Egholm M, Verna C, Rudan P, Brajkovic D, Kucan Ž, Gušić I, Doronichev VB, Golovanova LV, Lalueza-Fox C, de la Rasilla M, Fortea J, Rosas A, Schmitz RW, Johnson PLF, Eichler EE, Falush D, Birney E, Mullikin JC, Slatkin M, Nielsen R, Kelso J, Lachmann M, Reich D, Pääbo S. 2010. A Draft Sequence of the Neandertal Genome. *Science* 328:710-722. doi: [10.1126/science.1188021](https://doi.org/10.1126/science.1188021).
73. Prüfer K, Racimo F, Patterson N, Jay F, Sankararaman S, Sawyer S, Heinze A, Renaud G, Sudmant PH, de Filippo C, Li H, Mallick S, Dannemann M, Fu Q, Kircher M, Kuhlwilm M, Lachmann M, Meyer M, Ongyerth M, Siebauer M, Theunert C, Tandon A, Moorjani P, Pickrell J, Mullikin JC, Vohr SH, Green RE, Hellmann I, Johnson PLF, Blanche H, Cann H, Kitzman JO, Shendure J, Eichler EE, Lein ES, Bakken TE, Golovanova LV, Doronichev VB, Shunkov MV, Derevianko AP, Viola B, Slatkin M, Reich D, Kelso J, Pääbo S. 2013. The complete genome sequence of a Neanderthal from the Altai

759 Mountains. *Nature* 505:43–49. doi: [10.1038/nature12886](https://doi.org/10.1038/nature12886).



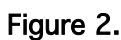

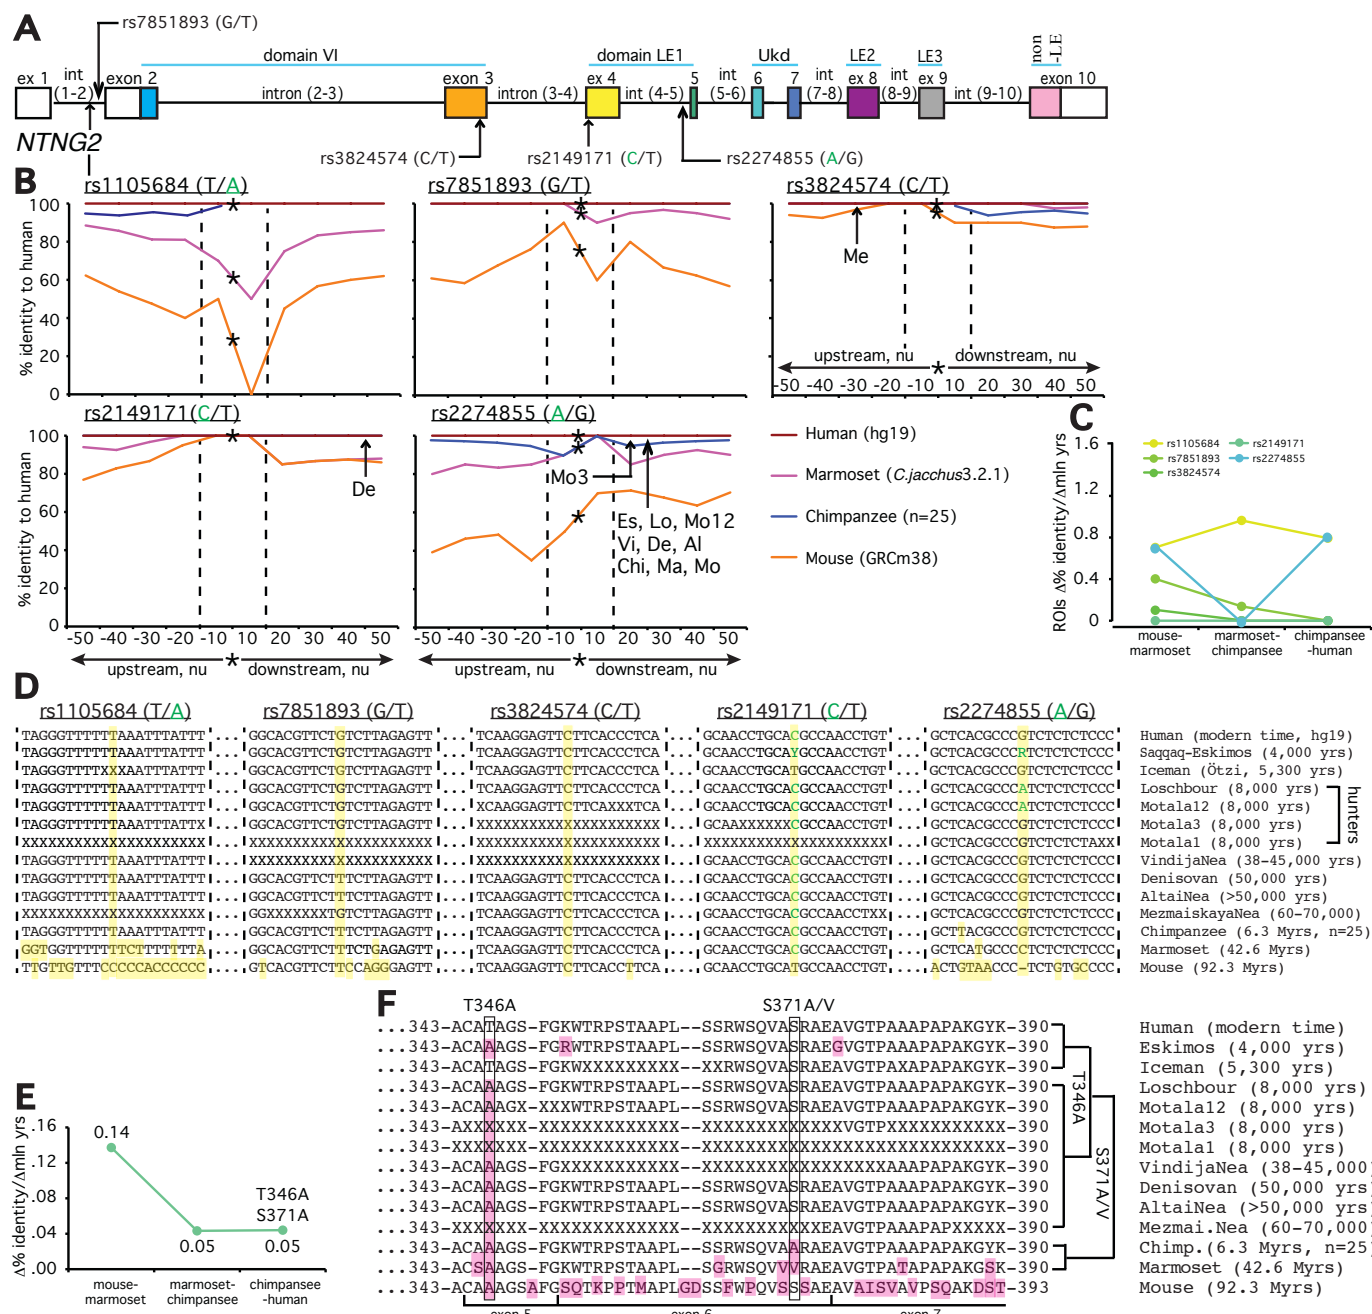

Figure 3.

**Figures 2 and 3. Accelerated evolution (AE) and definition of a ROI of *NTNG* loci embedding associated with the cognitive endophenotype alleles. Hominins and primate-specific protein amino acid substitutions.** (A) *NTNG1* and *NTNG2* SNPs' gene locations. Alleles associated with the lower IQ scores are shown either in red (*NTNG1*) or green (*NTNG2*). (B) Calculated identity percent of primates and mice to human gene loci as a function of distance from the position of a mutated allele (denoted as a star). Comparison was done in a stepwise manner as  $\pm 10$  nu to the maximum of  $\pm 50$  nu using Stretcher (<http://www.ebi.ac.uk/Tools/psa> (70)). The areas were compared based on the positioning relative to the point mutation without any manual curation for "the best-fit" alignment, but as per the algorithm output only. Due to low level of identity for mouse and marmoset the initial search of the mutation allele positioning was done aligning against the human corresponding full-length intron, and then second time against the obtained 101 nu query ("50 nu-SNP +50 nu"). Two dashed lines define an area of -10 nu to +10 nu from the mutation allele position. This area (21 nu in total) is defined as a ROI of the given mutation allele of a representing SNP. An arrow indicates a position of extinct hominins-specific mutations (see below). (C) Evolutionary rates for the ROIs calculated as a percent identity change relative to the hg19 over the mln of years of evolution. The spectrum color reflects the mutations' positioning order on a gene, as purple-yellow for *NTNG1*, and yellow-blue for *NTNG2*. (D) ROIs DNA sequences across hominins, primates and mice loci. The extinct and ancient hominin's *NTNG* paralogs were reconstructed from the available datasets (see **SM**): Saqqaq-Eskimos (Es: 59); Iceman (Ice: 58); Hunters (Loschbour (Lo), Motala12 (Mo12), Motala3 (Mo3), Motala1: 57); VindijaNea (Vi: 72); Denisovan (De), AltaiNea (Al) and MezmaiskayaNea (Me): 73; chimpanzee (Chi: reconstructed from (71), n=25 animals). Non-available sequences due to poor reads quality are denoted as X. Ensemble was used for the initial *NTNG* paralogs retrieval in marmoset (Ma) and mouse (Mo). Yellow (vertical strip) denotes the position of the SNP-related mutation allele and non-matched to human substitutions. (E) Evolution rates for the proteins encoded by the *NTNG1* (Netrin-G1) and *NTNG2* (Netrin-G2). (F) Amino acid changes for Netrin-Gs across hominins, primates and mice. For Netrin-G1, there are no common mutations among primates, hominins and modern human. Es contains 5 point mutations absent in other hominins; Chi contains 1 mutation outside the depicted area (A81S); all 4 mutations for marmoset are shown, and 10 more extra mutations for mouse are not shown. For Netrin-G2, all hominins except Ice (relative to hg19) carry a T346A mutation (exon 5-located and known as rs4962173), also detectable in primates and mouse. Chi's Netrin-G2 differs from all hominins by S371A mutation (exon 6 - nested) and present in marmoset as S371V. Non-matched to hg19 amino acids are highlighted as pink. Refer to **SM** for the full alignments.
